# Supplementary material for: Comparative Genomics Reveals Insight into Virulence Strategies of Plant Pathogenic Oomycetes
Source: PLoS One. 2013 Oct 4;8(10):e75072. doi: 10.1371/journal.pone.0075072 (PMC3790786; doi:10.1371/journal.pone.0075072)
Supplement: Table S1 — Summary of sequence reads generated for five Pythium species. Sequencing was done using the Illumina Genome Analyzer (GA) II or IIx platform. PF, purity-filtered; Par, Pythium arrhenomanes; Pir, Pythium irregulare; Piw, Pythium iwayamai; Puls, Pythium ultimum var. sporangiiferum; Pve, Pythium vexans. (XLS) [file pone.0075072.s002.xls]

## Sheet: TableS1
Table S1. Summary of sequence reads generated for five Pythium species. Sequencing was done using the Illumina Genome Analyzer (GA) II or IIx platform. PF, purity-filtered; Par, Pythium arrhenomanes; Pir, Pythium irregulare; Piw, Pythium iwayamai; Puls, Pythium ultimum var. sporangiiferum; Pve, Pythium vexans.
	Par	Pir	Piw	Puls	Pve
Sequencer	GAII	GAII	GAIIx	GAII	GAII
Number of PF reads	120888724	107294684	120007568	101732560	86473146
Read Length (bp)	76	76	120	76	76
Total PF reads (Gb)	9.2	8.2	14.4	7.7	6.6
Trim Length	41	51	61	41	51
Clean Reads	55443828	72691178	37443936	36951686	55618622
Total clean reads (Gb)	2.3	3.7	2.3	1.5	2.8
Total reads used	35301456	41651479	31117452	25723262	37874936
