# Supplementary material for: Comparative Genomics Reveals Insight into Virulence Strategies of Plant Pathogenic Oomycetes
Source: PLoS One. 2013 Oct 4;8(10):e75072. doi: 10.1371/journal.pone.0075072 (PMC3790786; doi:10.1371/journal.pone.0075072)
Supplement: Table S2 — Assembly parameters for five Pythium species. Sequenced reads were assembled using Velvet v0.7.63 [90] in conjunction with the VelvetOptimiser tool v2.10 [91]. Par, Pythium arrhenomanes; Pir, Pythium irregulare; Piw, Pythium iwayamai; Puls, Pythium ultimum var. sporangiiferum; Pve, Pythium vexans. (XLS) [file pone.0075072.s003.xls]

## Sheet: TableS2
Table S2. Assembly parameters for five Pythium species. Sequenced reads were assembled using Velvet v0.7.63 [90] in conjunction with the VelvetOptimiser tool v2.10 [91]. Par, Pythium arrhenomanes; Pir, Pythium irregulare; Piw, Pythium iwayamai; Puls, Pythium ultimum var. sporangiiferum; Pve, Pythium vexans.
	Par	Pir	Piw	Puls	Pve
Total MB in assembly	1447.4	2124.2	1898.2	1054.7	1931.6
Insert Size (bp)	532	250	556	519	250
K-mer size	23	29	31	23	31
Expected coverage	15	21	17.2	13	22
Coverage cut-off	3	2.8	8.5	1.2	1.4
Minimum contig length (bp)	500	500	200	500	500
