# Supplementary material for: Comparative Genomics Reveals Insight into Virulence Strategies of Plant Pathogenic Oomycetes
Source: PLoS One. 2013 Oct 4;8(10):e75072. doi: 10.1371/journal.pone.0075072 (PMC3790786; doi:10.1371/journal.pone.0075072)
Supplement: Table S3 — Assembly and annotation statistics of thirteen stramenopile genomes. Assembly and annotation statistics were compared to data published by Levesque et al. for Pythium ultimum var. ultimum [53], Haas et al. for Phytophthora infestans [6], Tyler et al. for Phytophthora ramorum and Phytophthora sojae [7], Baxter et al. for Hyaloperonospora arabidopsidis [52], Armbrust et al. for Thalassiosira pseudonana [58] and Bowler et al. for Phaeodactylum tricornutum [57]. Pap, Pythium aphanidermatum; Par, Pythium arrhenomanes; Pir, Pythium irregulare; Piw, Pythium iwayamai; Puls, Pythium ultimum var. sporangiiferum; Pult, Pythium ultimum var. ultimum; Pve, Pythium vexans; Phin, Phytophthora infestans; Phrm, Phytophthora ramorum; Phsj, Phytophthora sojae; Hpa, Hyaloperonospora arabidopsidis; Thps, Thalassiosira pseudonana; Phtr, Phaeodactylum tricornutum. (XLS) [file pone.0075072.s004.xls]

## Sheet: TableS3
Table S3. Assembly and annotation statistics of thirteen stramenopile genomes. Assembly and annotation statistics were compared to data published by Levesque et al. for Pythium ultimum var. ultimum [53], Haas et al. for Phytophthora infestans [6], Tyler et al. for Phytophthora ramorum and Phytophthora sojae [7], Baxter et al. for Hyaloperonospora arabidopsidis [52], Armbrust et al. for Thalassios…
	Pap	Par	Pir	Piw	Puls	Pve	Har	Phin	Phrm	Phsj	Phtr	Pult	Thps
Assembly
Number of contigs/scaffolds	5667	10978	5887	11542	5482	3685	3,138§	4921	7588	5577	NA	1,747§	NA
N50 contig length (Kb)	37.39	9.77	23.22	11.01	19.11	29.24	NA	44.5	47.5	105.7	NA	124	NA
Total contig length (Mb)	35.88	44.68	42.97	43.21	37.64	33.85	85.4	190	54.4	78	NA	42.8	NA
Maximum contig length (Kb)	222.5	110.39	175.21	96.23	120.81	185.88	NA	NA	NA	NA	NA	182.93	NA
Annotation
Number of genes	12305	13805	13804	14875	14086	11957	14543	17797	15743	19027	10402	15291	11776
Number of transcripts	12312	13805	13805	14875	14096	11958	NA	NA	NA	NA	NA	15323	NA
Average gene length (bp)	1619	1541	1707	1542	1495	1767	NA	NA	NA	NA	NA	1503	NA
Average CDS length (bp)	1470	1339	1495	1325	1130	1575	NA	NA	NA	NA	NA	1299	NA
Average exon length (bp)	630	507	520	481	312	538	NA	NA	NA	NA	NA	498	NA
Average intron length (bp)	112.36	122.35	113.84	123.49	133.1	100.72	NA	NA	NA	NA	NA	115	NA
§Number of scaffolds.
