# Supplementary material for: Comparative Genomics Reveals Insight into Virulence Strategies of Plant Pathogenic Oomycetes
Source: PLoS One. 2013 Oct 4;8(10):e75072. doi: 10.1371/journal.pone.0075072 (PMC3790786; doi:10.1371/journal.pone.0075072)
Supplement: Table S4 — Whole transcriptome sequencing data for four Pythium species. Sequence reads from each species were mapped to the respective genome using TopHat v1.1.4 [105]. Fragments per kilobase pair of exon model per million fragments mapped (FPKM) values were calculated using Cufflinks v0.9.3 [107] and genome annotation. Genes are considered expressed if FPKM value and FPKM 95% confidence interval lower boundary was greater than 0.001 and zero, respectively. (XLS) [file pone.0075072.s005.xls]

## Sheet: TableS4
Table S4. Whole transcriptome sequencing data for four Pythium species. Sequence reads from each species were mapped to the respective genome using TopHat v1.1.4 [105]. Fragments per kilobase pair of exon model per million fragments mapped (FPKM) values were calculated using Cufflinks v0.9.3 [107] and genome annotation.
Genome	Number of predicted genes	Number of purity filtered reads (million)	Number of mapped reads (million)	Number of expressed genes¶	Percentage of genes expressed	Median FPKM§	Highest FPKM
Pythium arrhenomanes	13805	29.88	24.78	10227	74	11.2	10890.2
Pythium irregulare	13804	31.65	27.36	10359	75	8.25	18853.6
Pythium iwayamai	14875	21.72	18.92	10487	71	12.72	16351.7
Pythium vexans	11957	27.44	24.25	9652	81	12.86	30906.3
¶Genes are considered expressed if FPKM value and FPKM 95% confidence interval lower boundary was greater than 0.001 and zero, respectively.
§Median FPKM value for all expressed genes.
