# Supplementary material for: Comparative Genomics Reveals Insight into Virulence Strategies of Plant Pathogenic Oomycetes
Source: PLoS One. 2013 Oct 4;8(10):e75072. doi: 10.1371/journal.pone.0075072 (PMC3790786; doi:10.1371/journal.pone.0075072)
Supplement: Table S5 — Protein domains enriched or depleted in core Pythium and Pythium species-specific clusters. Fold change numbers are color coded as black for enriched and red for depleted domains. Only protein domains significantly enriched or depleted are shown. (XLS) [file pone.0075072.s006.xls]

## Sheet: TableS5
Table S5. Protein domains enriched or depleted in core Pythium and Pythium species-specific genes. Fold change numbers are color coded as black for enrichment and red for depletion. Only protein domains significantly enriched or depleted are shown.
Taxon/group	Category	Domain accession	Description	Enrichment/depletion fold§	P-value£
Core Pythium gene familiesŦ	Enrichment	IPR002200	Elicitin	11.6474	0.00315842
		IPR001547	Glycoside hydrolase, family 5	9.64361	2.70351e-05
		IPR001296	Glycosyl transferase, group 1	6.91739	0.0198083
		IPR008701	Necrosis inducing	6.48505	0.0124023
		IPR000569	HECT Uniquitin ligase	5.60073	0.0454333
		IPR000668	Peptidase C1A, papain C-terminal	4.85937	0.0390911
		IPR001360	Glycoside hydrolase, family 1	4.59137	0.0119923
		IPR000909	Phospholipase C, phosphatidylinositol-specific	4.09	0.00345
		IPR013766	Thioredoxin domain	2.18274	0.0311546
	Depletion	IPR018108	Mitochondrial substrate/solute carrier	-3	0.001521
		IPR019781	WD40 repeat, subgroup	-5	0.008721
		IPR020683	Ankyrin repeat-containing domain	-5.03	0.0245
		IPR001140	ABC transporter-transmembrane domain	-7	0.021
Py. aphanidermatum-specific genes	Enrichment	IPR021109	Peptidase aspartic	27	0.003421
		IPR009009	Endoglucanase	22	0.0071
		IPR018170	Aldo/keto reductase, conserved site	21	0.0341
		IPR002022	Pectate lyase	19	0.0041
		IPR000675	Cutinase	10	4.21e-05
		IPR001938	Thaumatin/pathogenesis-related	5	6.31e-05
		IPR018936	Phosphatidylinositol 3/4-kinase, conserved site	4	0.00631
		IPR020576	Heat shock protein	3	0.031
	Depletion	IPR019734	Tetratricopeptide repeat	-2	0.00521
		IPR003591	Leucine rich repeat	-3	0.00721
		IPR002347	Glucose dehydrogenase	-7	0.00121
Py. arrhenomanes-specific genes	Enrichment	IPR011497	Protease inhibitor, Kazal-type	32	0.00060982
		IPR000675	Cutinase	32	0.000105141
		IPR015566	Heat shock protein	31	0.00012617
		IPR007112	Expansin/Endoglucanase like	26	4.021e-05
		IPR008701	Necrosis inducing	26	1.31e-05
		IPR002594	Glycoside hydrolase, family 12	12.94	0.000443
		IPR002022	Pectate lyase	11	0.0121
		IPR020842	Polyketide synthase	8	0.0921
	Depletion	IPR001128	Cytochrome P450	-3	0.0421
		IPR001680	WD40 repeat	-3	0.0001
		IPR002110	Ankyrin repeat	-4	0.0021
Py. irregulare-specific genes	Enrichment	IPR001378	Uncharacterised protein family UPF0066	23.345	7.95e-05
		IPR006026	Peptidase, metallopeptidase	21.432	5.97e-05
		IPR019540	Phosphatidylinositol-glycan biosynthesis class S protein	19.543	1.99e-05
		IPR018073	Proteinase inhibitor I25, cystatin, conserved site	17.432	6.7e-05
		IPR016840	Glycoside hydrolase, family 43, endo-1, 5-alpha-L-arabinosidase	16.342	1.4e-05
		IPR006104	Glycoside hydrolase family 2, carbohydrate-binding	14.532	3.49e-05
		IPR011692	Stress up-regulated Nod 19	13.547	3.98e-05
		IPR002022	Pectate lyase/Amb allergen	12.2951	0.000198859
		IPR011050	Pectin lyase fold/virulence factor	10.7582	0.000397717
	Depletion	IPR017441	Protein kinase, ATP binding site	-4.9854	0.00232665
		IPR011992	EF-hand-like domain	-5.678	0.00346014
		IPR002290	Serine/threonine-protein kinase domain	-5.132	0.0035198
		IPR020683	Ankyrin repeat-containing domain	-6.578	0.0149542
		IPR000408	Regulator of chromosome condensation, RCC1	-13.876	0.00851115
Py. iwayamai-specific genes	Enrichment	IPR000372	Leucine-rich repeat-containing domain	15.574	0.02
		IPR018338	Carbonic anhydrase, alpha-class	11.8977	0.009
		IPR020863	MACPF/perforin domain, conserved site	9.00987	0.0071
		IPR002022	Pectate lyase/Amb allergen	9.57399	0.005
		IPR011583	Chitinase II	9.57396	0.0066
		IPR001938	Thaumatin, pathogenesis-related	7.53435	0.000432
		IPR007112	Expansin 45, endoglucanase-like	4.716	0.000210283
		IPR011497	Protease inhibitor, Kazal-type	2.85801	0.000231311
		IPR001547	Cellulase family A (GH5)	2.40991	0.000693933
	Depletion	IPR011050	Polysaccharide lyase, family 3	-2	0.000189255
		IPR008271	Serine/threonine-protein kinase	-5	0.000189255
		IPR020683	Ankyrin repeat-containing domain	-6	0.000189255
Py. ultimum var. sporangiiferum-specific genes	Enrichment	IPR018073	Proteinase inhibitor I25, cystatin, conserved site	14	0.0031
		IPR014867	Spore coat protein CotH	13	0.0061
		IPR004898	Pectate lyase, catalytic	6	0.038
		IPR007112	Expansin 45, endoglucanase-like	6	0.000357481
		IPR020842	Polyketide synthase/Fatty acid synthase, KR	5	0.0013
		IPR002350	Proteinase inhibitor I1, Kazal	4	0.000294396
		IPR011683	Glycosyl hydrolase, family 53	2.55	0.00161918
	Depletion	IPR013525	ABC-2 type transporter	-3	0.000189255
		IPR000254	Cellulose-binding domain, fungal	-6	0.000883188
		IPR001296	Glycosyl transferase, family 1	-8	0.0011145
		IPR017442	Serine/threonine-protein kinase-like domain	-15	0.032
Py. vexans-specific genes	Enrichment	IPR003439	ABC transporter-like domain	29.43	0.000794
		IPR007271	Nucleotide-sugar transporter	28.25	0.000453
		IPR001000	Glycoside hydrolase, family 10	27.89	0.000315424
		IPR002168	Lipase, GDXG, active site	27	2.21e-05
		IPR013582	Phospholipase D/viral envelope	25	0.000147198
		IPR022683	Peptidase C2, calpain family	24	0.00248134
		IPR000372	Leucine-rich repeat-containing domain	22	0.0031
		IPR011583	Chitinase II	6.00036	0.000588792
		IPR000743	Glycoside hydrolase, family 28	4.90039	0.000625707
		IPR007112	Expansin 45, endoglucanase-like	3.6669	0.000168226
	Depletion	IPR003591	Leucine-rich repeat, typical subtype	-2	0.0421
		IPR017442	Serine/threonine-protein kinase	-6	0.0021
		IPR002347	Glucose/ribitol dehydrogenase	-7	0.01
ŦGene families shared by all Pythium species.
§Enrichment fold correspond to frequency of a given domain in species-specific genes over frequency in the rest of the proteome. Depletion fold is given as 1 over enrichment fold.
£Chi-square test with Bonferroni correction, p-value < 0.05.
