# Supplementary material for: Comparative Genomics Reveals Insight into Virulence Strategies of Plant Pathogenic Oomycetes
Source: PLoS One. 2013 Oct 4;8(10):e75072. doi: 10.1371/journal.pone.0075072 (PMC3790786; doi:10.1371/journal.pone.0075072)
Supplement: Table S7 — Quantitative comparison of pathogenicity-related proteins in stramenopiles. Genes were predicted for all datasets using PFAM v23.0 prediction and BLASTP searches. Results were compared to published genome datasets for Pythium ultimum var. ultimum [53], Phytophthora species [6], [7], Hyaloperonospora arabidopsidis [52] and Thalassiosira pseudonana [58]. The numbers in the denominator show the number of genes with expression support. Genes are considered expressed if FPKM value and FPKM 95% confidence interval lower boundary was greater than 0.001 and zero respectively. The expression data for Pythium ultimum var. ultimum were taken from Lévesque et al. [53]. Pap, Pythium aphanidermatum; Par, Pythium arrhemonanes; Pir, Pythium irregulare; Piw, Pythium iwayamai; Puls, Pythium ultimum var. sporangiiferum; Pult, Pythium ultimum var. ultimum; Pve, Pythium vexans; Phin, Phytophthora infestans; Phrm, Phytophthora ramorum; Phsj, Phytophthora sojae; Hpa, Hyaloperonospora arabidopsidis; Thps, Thalassiosira pseudonana. (XLS) [file pone.0075072.s008.xls]

## Sheet: TableS7
Table S7. Quantitative comparison of pathogenicity-related proteins in stramenopiles. Genes were predicted for all datasets using Pfam prediction and BLASTP searches. Results were compared to published genome datasets for Pythium ultimum var. ultimum [53], Phytophthora species [6, 7], Hyaloperonospora arabidopsidis [52] and Thalassiosira pseudonana [58]. The numbers in the denominator show the nu…
Protein	Pap	Par	Pir	Piw	Puls	Pve	Pult	Phin	Phrm	Phsj	Hpa	Thps
Aspartyl protease	43*	37(31)	31(27)	27(21)	25	33(29)	29(22)	12	18	16	9	5
Cysteine protease families	49	51(43)*	36(29)	33(28)	43	39(34)	42(29)	33	42	33	7	16
Glycoside hydrolase	77	114(71)	93(53)	89(41)	82	105(43)	109(63)	216*	166	196	72	32
Pectate lyase	18	4(0)	12(2)	7(1)	10	10(1)	27(7)	59*	43	51	8	0
Cutinase	8	6(2)	0	0	0	0	0	4	4	14*	2	0
Lipases	33*	18(1)	32(3)	19(2)	18	18(4)	31(5)	19	17	27	10	22
Phospholipases	21	27(3)	17(2)	28(4)	26	20(2)	20(6)	36*	28	31	13	18
Protease inhibitors	57	61(27)*	48(22)	51(17)	36	43(11)	43(21)	38	18	26	3	11
Cytochrome P450s	35	66(29)*	55(17)	65(18)	38	34(9)	41(18)	28	31	31	16	7
ABC transporters	168	157(82)	173(81)*	136(61)	146	163(99)	140(62)	137	135	141	53	50
NPP1-like proteins (necrosis inducing proteins)	5	5(1)	4(0)	4(0)	4	5(1)	7(2)	27	59*	39	24	0
Elicitin-like proteins	29	25(5)	32(7)	26(6)	29	33(11)	24(9)	40	50	57*	6	0
Lectin-like proteins	20	22(8)*	16(5)	21(6)	13	16(4)	20(3)	10	15	13	6	0
Crinklers (CRN family)	29	28(6)	11(2)	10(2)	17	12(3)	26(8)	196*	19	100	20	0
RXLR/Q effector candidates	0	0	0	0	0	0	0	563*	350	350	134	62
Serine protease families	130	141(117	142(127)*	97(72)	93	85(71)	85(67)	60	57	63	53	16
*Asterix mark indicate highest numbers among annotated genomes.
