# Supplementary material for: Comparative Genomics Reveals Insight into Virulence Strategies of Plant Pathogenic Oomycetes
Source: PLoS One. 2013 Oct 4;8(10):e75072. doi: 10.1371/journal.pone.0075072 (PMC3790786; doi:10.1371/journal.pone.0075072)
Supplement: Table S10 — Protein domains enriched in core Pythium and species-specific secretome. The table shows the enrichment fold in core Pythium and species-specific secretome as compared to the non-secretome. Only domains significantly enriched in secretome are shown. (XLS) [file pone.0075072.s011.xls]

## Sheet: TableS10
Table S10. Protein domains enriched in the core Pythium and species-specific secretome. The table shows the enrichment fold in core Pythium and specific-specific secretome as compared to the non-secretome. Only domains significantly enriched are shown.
Taxon/group	Pfam accession	Interpro accession	Description	Enrichment fold¶	P-value§
Core Pythium secretomeŦ	PF00964	IPR002200	Elicitin	10.0738	0.00317842
	PF01055	IPR000322	Glycoside hydrolase, family 31	9.26436	4.73351e-05
	PF00534	IPR001296	Glycosyl transferase, group 1	6.91739	0.0148083
	PF00026	IPR001969	Aspartic peptidase, active site	5.60073	0.0354333
	PF00112	IPR000668	Peptidase C1A, papain C-terminal	4.85937	0.0390911
	PF00008	IPR006209	EGF-like domain	3.49137	0.0109923
	PF03211	IPR004898	Pectate lyase, catalytic	2.81019	0.00138558
	PF00085	IPR013766	Thioredoxin domain	2.18274	0.0311546
	PF00481	IPR014045	Protein phosphatase 2C, N-terminal	1.80842	0.00121451
Py. aphanidermatum-specific secretome	PF00026	IPR001461	Peptidase A1	8.91695	2.17891e-05
	PF01083	IPR000675	Cutinase	8.67442	0.0352064
	PF05630	IPR008701	NPP1 domain	7.78206	0.0161933
	PF00544	IPR002022	Pectate lyase/Amb allergen	5.94021	6.4925e-05
	PF00226	IPR001623	Heat shock protein DnaJ, N-terminal	5.40421	0.0221619
	PF00535	IPR001173	Glycosyl transferase, family 2	2.46714	0.0204155
	PF00295	IPR000743	Glycoside hydrolase, family 28	2.25819	6.35481e-05
	PF00240	IPR000626	Ubiquitin	2.19655	2.04327e-05
	PF00005	IPR003439	ABC transporter-like domain	1.87069	9.43008e-06
Py. arrhenomanes-specific secretome	PF01083	IPR000675	Cutinase	14.8638	9.88466e-05
	PF01670	IPR002594	Glycoside hydrolase, family 12	9.00234	3.35259e-05
	PF07648	IPR011497	Protease inhibitor, Kazal-type	8.10632	0.000667043
	PF08246	IPR013201	Proteinase inhibitor I29, cathepsin propeptide	4.40057	0.010482
	PF00194	IPR001148	Carbonic anhydrase, alpha-class, catalytic domain	2.97011	0.0010667
	PF00457	IPR001137	Glycoside hydrolase, family 11	2.79528	0.000144306
	PF01595	IPR002550	Protein of unknown function DUF21	2.69769	4.309e-05
	PF01565	IPR006094	FAD binding domain	2.20247	0.000104907
Py. irregulare-specific secretome	PF00026	IPR001461	Peptidase A1	12.6977	3.09e-05
	PF01095	IPR000070	Pectinesterase	8.61684	0.000535629
	PF05630	IPR008701	NPP1 domain	7.40057	0.00204273
	PF00188	IPR013871	Cysteine-rich secretary protein	5.87011	3.0085e-06
	PF00050	IPR011497	Serine protease inhibitor, Kazal-type	4.97686	0.00365259
	PF00248	IPR001395	Aldo/keto reductase	3.20247	0.00667043
	PF03211	IPR004898	Pectate lyase, catalytic	2.61684	0.00114322
	PF00652	IPR000772	Ricin B lectin	2.24708	0.00482039
	PF03552	IPR005150	Cellulose synthase	2.16168	0.000135356
Py. iwayamai-specific secretome	PF00560	IPR001611	Leucine-rich repeat	11.8422	0.0021451
	PF01400	IPR001506	Peptidase M12A, astacin	9.16948	0.00278911
	PF00443	IPR001394	Peptidase C19, ubiquitin carboxyl-terminal hydrolase 2	8.44214	0.0320642
	PF03031	IPR004274	NLI interacting factor-like phosphatase	6.92064	0.0109333
	PF00026	IPR001461	Peptidase A1	5.78206	2.40328e-06
	PF00614	IPR001736	Phospholipase D/Transphosphatidylase	5.40212	4.92502e-05
	PF04142	IPR007271	Nucleotide-sugar transporter	2.71397	0.0205494
	PF00613	IPR001263	Phosphoinositide 3-kinase, accessory (PIK) domain	2.58188	5.48105e-05
Py. ultimum var. sporangiiferum-specific secretome	PF00005	IPR003439	ABC transporter-like	6.55022	0.000373313
	PF07648	IPR011497	Protease inhibitor, Kazal-type	3.87069	0.000304963
	PF00632	IPR000569	HECT ubiquitin ligase	3.86379	0.00462776
	PF01490	IPR013057	Amino acid transporter, transmembrane	3.00234	0.000525929
	PF00130	IPR002219	Protein kinase C-like, phorbol ester/diacylglycerol binding	2.10632	0.004309
	PF00615	IPR000342	Regulator of G protein signalling	1.62126	0.00132166
	PF00520	IPR005821	Ion transport	1.40057	0.00403896
	PF07690	IPR011701	Major facilitator superfamily MFS-1	1.01061	0.000604309
	PF00024	IPR003014	PAN-1 domain	1.00795	0.00044306
Py. vexans-specific secretome	PF00082	IPR000209	Peptidase S8/S53, subtilisin/kexin/sedolisin	16.4738	0.358417
	PF00083	IPR005828	General substrate transporter	9.43615	7.03512e-05
	PF00005	IPR003439	ABC transporter-like domain	6.05304	0.0402279
	PF00106	IPR002198	Short-chain dehydrogenase/reductase SDR	5.07276	0.0433347
	PF00122	IPR008250	ATPase	4.85937	0.0309106
	PF00544	IPR002022	Pectate lyase/Amb allergen	4.13693	0.0119231
	PF00916	IPR011547	Sulphate transporter	3.81019	0.00185585
	PF00111	IPR001041	Ferredoxin	2.82739	0.0115464
ŦSecretome shared by all Pythium species.
¶Enrichment fold correspond to frequency of a given domain in core or species-specific families over frequency in the rest of the proteome.
§Chi-square test with Bonferroni correction, p-value < 0.05.
